# Supplementary material for: 3-Bromopyruvate Suppresses the Malignant Phenotype of Vemurafenib-Resistant Melanoma Cells
Source: MDPI journal article supplement (doi:10.3390/ijms232415650), 2022-12-09
Supplement: s1 [file s1]

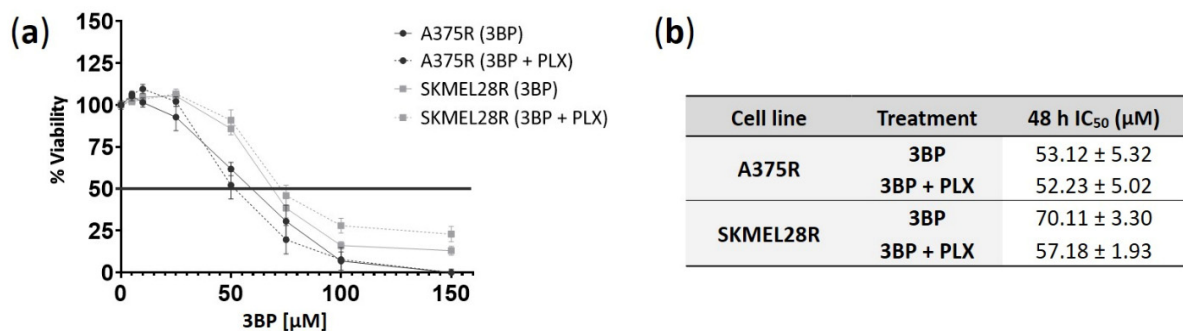

**Figure S1.** Cell viability analysis using a sulforhodamine B (SRB) assay in PLX-resistant melanoma cells treated with 3-bromopyruvate (3BP) for 48 hours. **(a)** The dose-response curve represents the viability of vemurafenib (PLX)-resistant melanoma cells treated with different concentrations of 3BP (0-150 μM), either alone or combined with PLX (4.5 μM for A375R cells and 6.0 μM for SKMEL28R cells). Data were normalized to the vehicle control (100%). **(b)** IC<sub>50</sub> values of PLX-resistant melanoma cells treated with 3BP for 48 hours. Data represent the mean ± SEM of at least three independent experiments performed in triplicate.

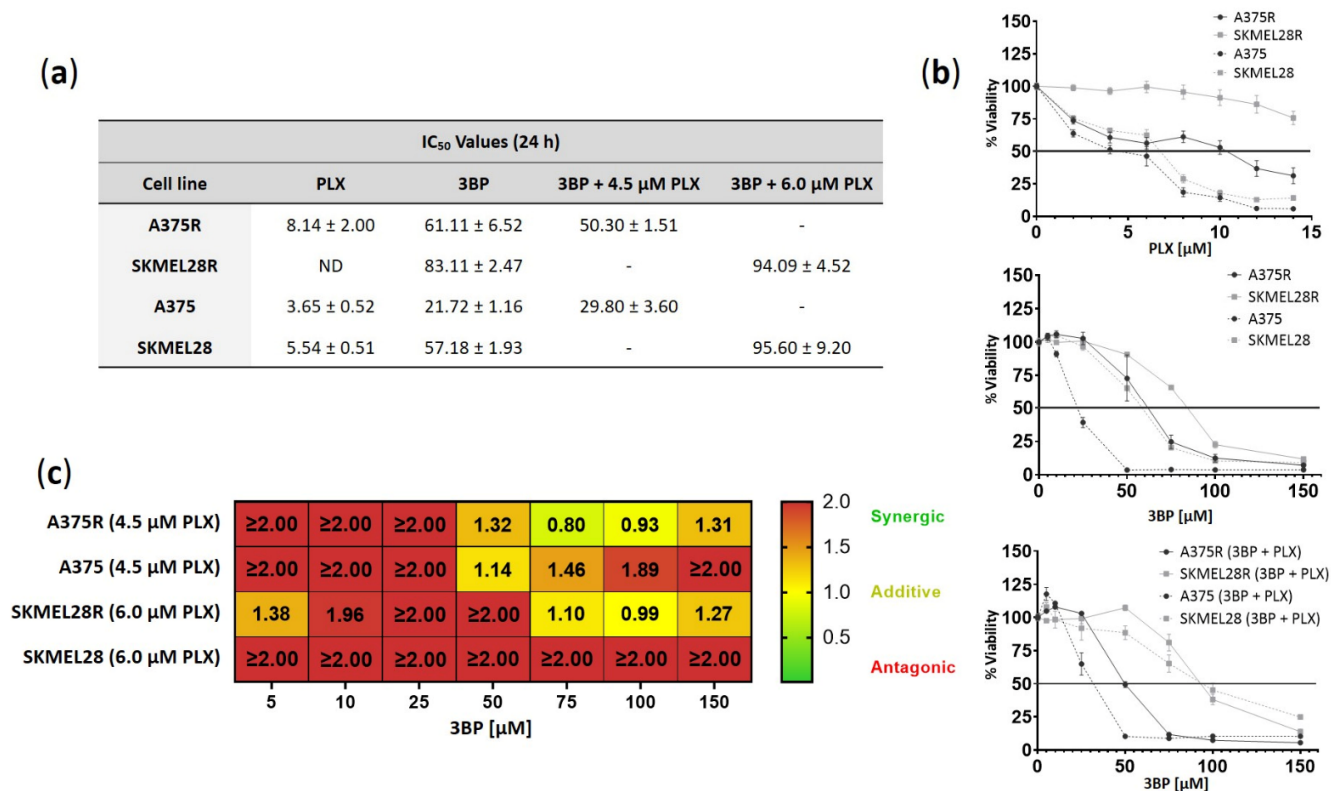

**Figure S2.** Combination assay and cell viability analysis using a sulforhodamine B (SRB) assay in naïve and vemurafenib (PLX)-resistant melanoma cells treated with PLX, 3-bromopyruvate (3BP), and 3BP+PLX for 24 hours. **(a)** IC<sub>50</sub> values of naïve and PLX-resistant melanoma cells treated with 0-14 μM PLX or 0-150 μM 3BP alone or in combination with PLX (4.5 μM for A375R cells and 6.0 μM for SKMEL28R cells) for 24 hours. ND, not determined. **(b)** The dose-response curve represents the viability of naïve and PLX-resistant melanoma cells treated with different concentrations of 3BP, PLX, and 3BP+PLX. Data were normalized to the vehicle control (100%). Data represent the mean ± SEM of at least three independent experiments performed in triplicate. **(c)** Combination index (CI) heatmap of melanoma cell lines treated with 0-150 μM 3BP and PLX (4.5 μM for A375 and 6.0 μM for SKMEL28) for 24 hours. CI > 1 antagonism or competition; CI = 1 additive; CI < 1 synergism.

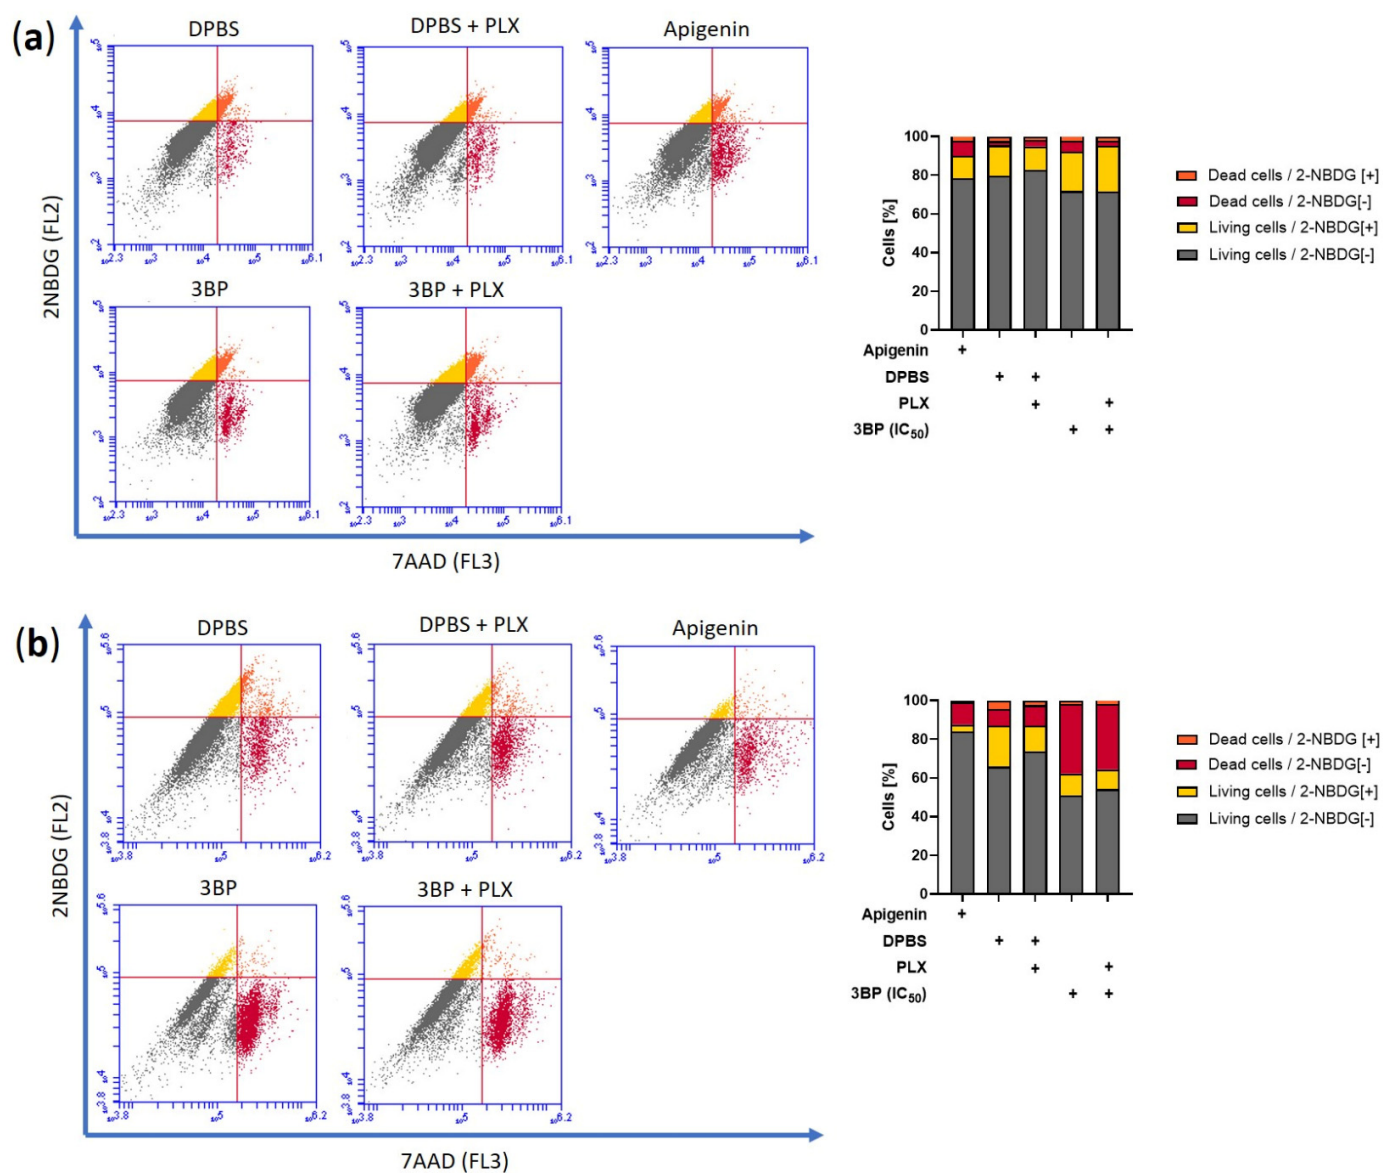

**Figure S3.** Flow cytometry analysis of A375R and SKMEL28R melanoma cells treated with 3-bromopyruvate (3BP) after 7-aminoactinomycin D (7AAD)/ 2-(N-(7-nitrobenz-2-oxa-1,3-diazol-4-yl)amino)-2-deoxyglucose (2NBDG) staining. **(a)** Representative flow cytometry plots of the A375R cell line treated with apigenin, Dulbecco's phosphate-buffered saline (DPBS), or 3BP, either alone or combined with 4.5  $\mu$ M vemurafenib (PLX), for 4 hours and a chart summarizing the percentage distribution of different categories of cell death. **(b)** Representative flow cytometry plots of the SKMEL28R cell line treated with 3BP, either alone or combined with 6.0  $\mu$ M PLX, for 4 hours and a chart summarizing the percentage distribution of different categories of cell death. Flow cytometry profiles represent 7AAD staining on the *x*-axis and 2NBDG on the *y*-axis. The positive signs in the charts indicate the presence of a defined treatment. Data represent the means of at least three independent experiments performed in triplicate.

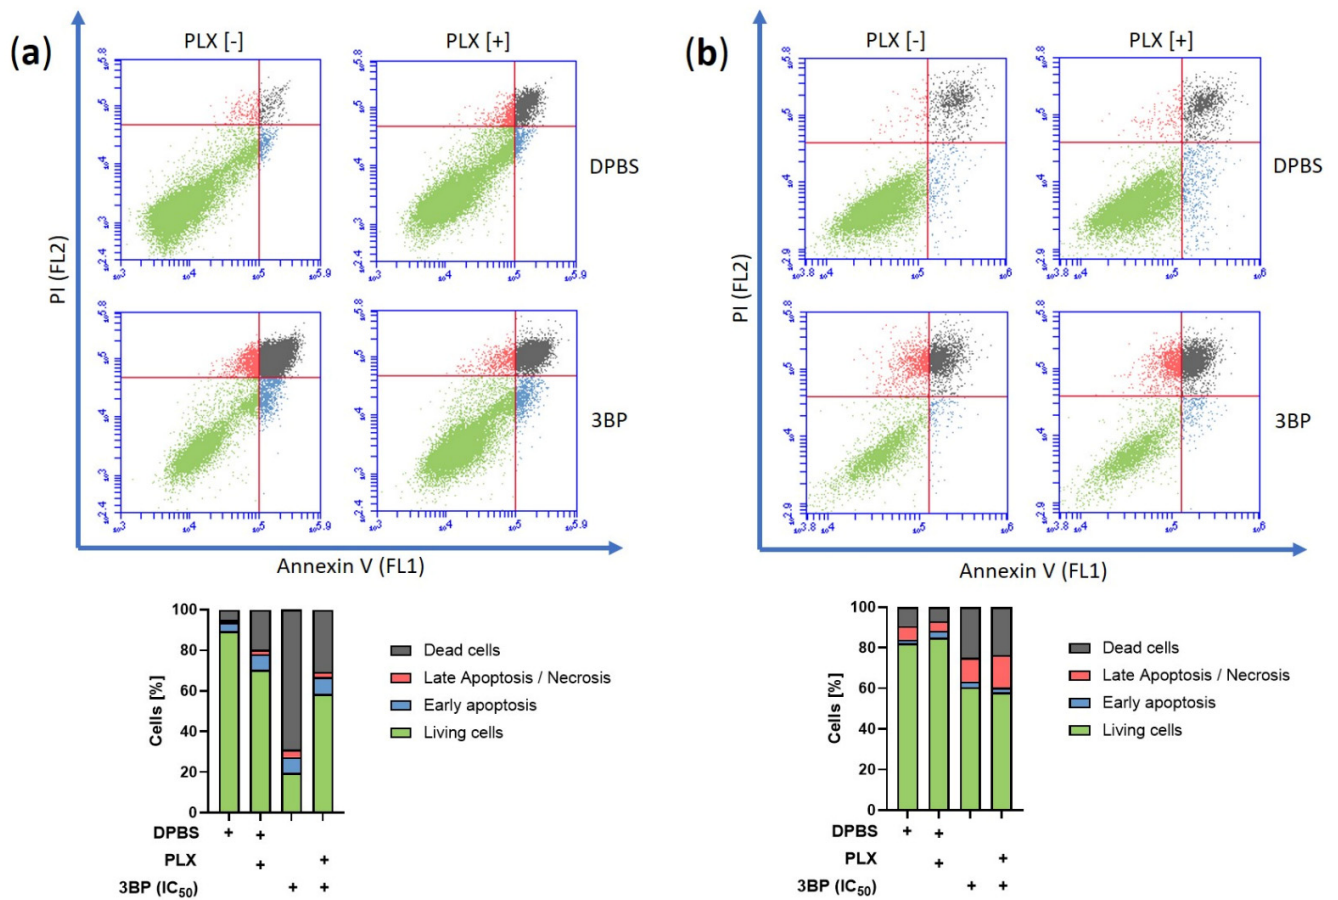

**Figure S4.** Flow cytometry analysis of A375R and SKMEL28R melanoma cells treated with 3-bromopyruvate (3BP) after annexin V/propidium iodide (PI) staining. **(a)** Representative flow cytometry plots of the A375R cell line treated with DPBS or 3BP, either alone or combined with 4.5  $\mu$ M PLX, for 24 hours and a chart summarizing the percentage distribution of different categories of cell death. **(b)** Representative flow cytometry plots of the SKMEL28R cell line treated with 3BP, either alone or combined with 6.0  $\mu$ M PLX, for 24 hours and a chart summarizing the percentage distribution of different categories of cell death. Flow cytometry profiles represent annexin V staining on the  $x$ -axis and PI staining on the  $y$ -axis. The positive signs in the charts indicate the presence of a defined treatment. Data represent the means of at least three independent experiments performed in triplicate.

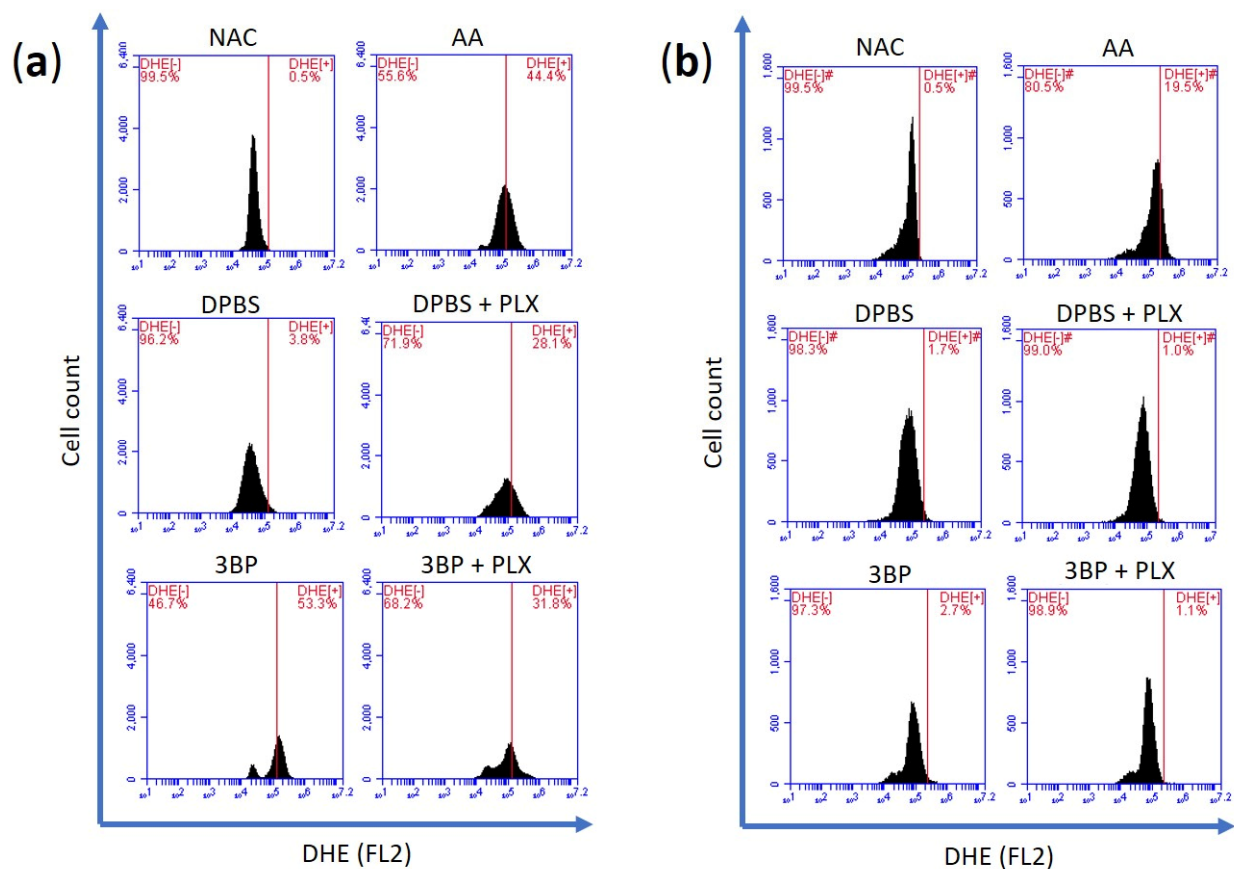

**Figure S5.** Flow cytometry analysis of A375R and SKMEL28R melanoma cells treated with 3BP after dihydroethidium (DHE) staining. (a) Representative flow cytometry plots of the A375R cell line treated with n-acetyl cysteine (NAC), antimycin A (AA), Dulbecco's phosphate-buffered saline (DPBS) or 3-bromopyruvate (3BP), either alone or combined with 4.5  $\mu$ M vemurafenib (PLX), for 24 hours. (b) Representative flow cytometry plots of SKMEL28R cells treated with n-acetyl cysteine (NAC), antimycin A (AA), DPBS or 3BP, either alone or combined with 6.0  $\mu$ M PLX, for 24 hours. Flow cytometry profiles represent DHE staining on the x-axis and cell count on the y-axis.

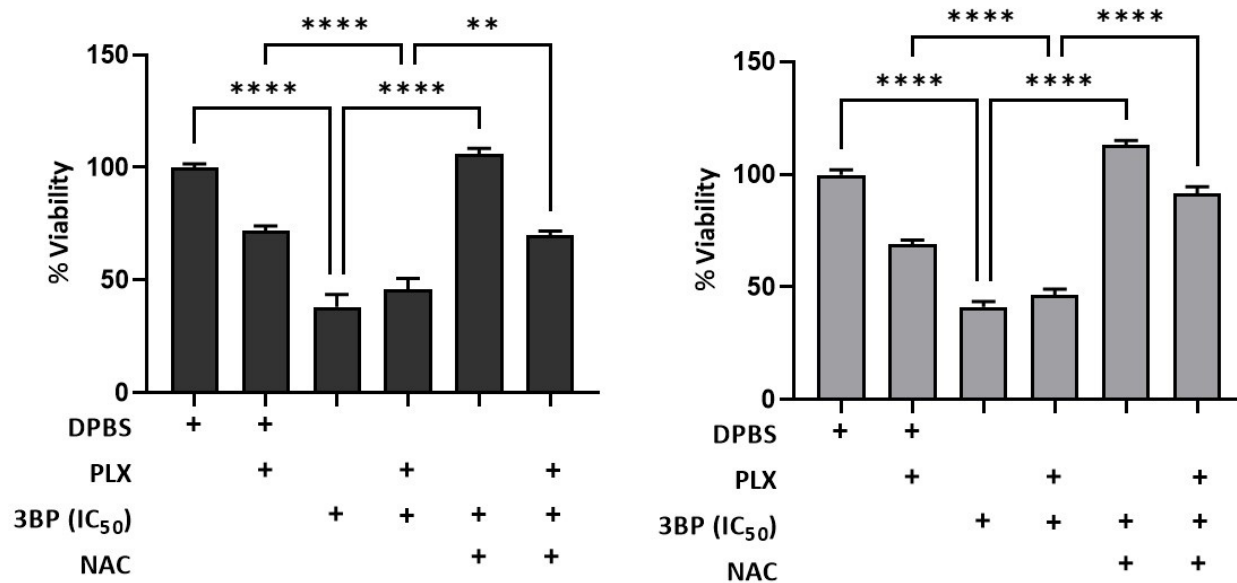

**Figure S6.** Influence of NAC (N-acetylcysteine) on the viability of vemurafenib (PLX)-resistant melanoma cells. Cell viability analysis using a sulforhodamine B (SRB) assay in PLX-resistant melanoma cells treated with 3-bromopyruvate (3BP) IC<sub>50</sub>, either alone or combined with PLX (4.5  $\mu$ M for A375R and 6.0  $\mu$ M for SKMEL28R), for 24 hours after exposure to 1 mM NAC. Dark gray represents A375R cells, and light gray represents SKMEL28R melanoma cells. Data were normalized to the vehicle control (100%). The positive signs in the bar charts indicate the presence of a defined treatment. Data represent the mean  $\pm$  SEM of at least three independent experiments performed in triplicate. \*\*  $p \leq .01$ ; \*\*\*  $p \leq .01$ ; \*\*\*\*  $p \leq .0001$ .
